# Supplementary material for: Scalable probabilistic PCA for large-scale genetic variation data
Source: PLOS journal article supplement (doi:10.1371/journal.pgen.1008773), 2020-05-29
Supplement: S2 (10.1371/journal.pgen.1008773.s002) [file journal.pgen.1008773.s002]

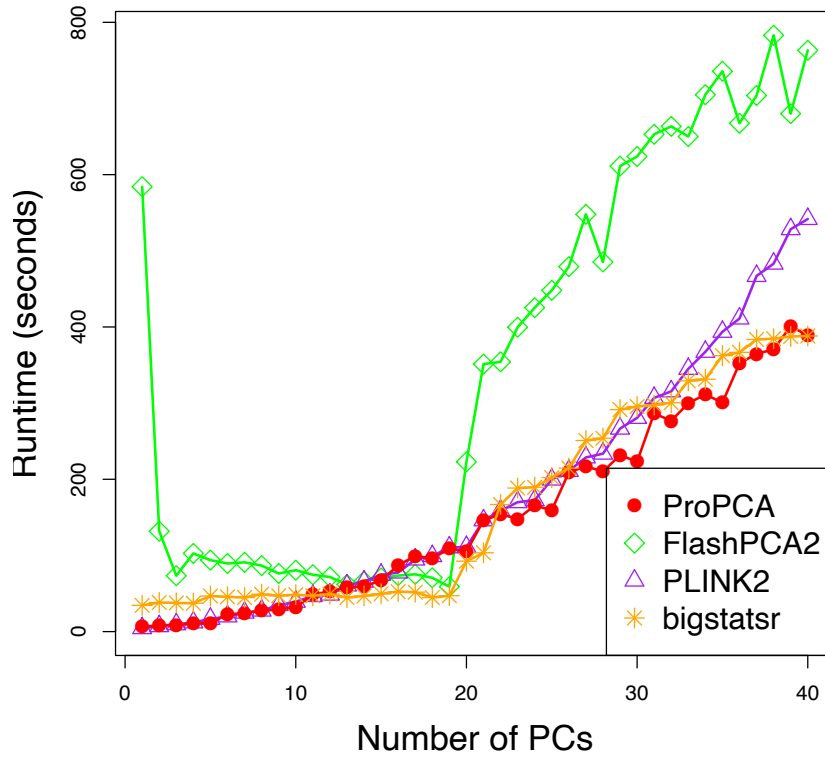

Figure S1: **ProPCA is efficient at computing large numbers of PCs.** Comparison of methods when calculating differing numbers of principal components. We computed principal components ranging from 1-40 on a dataset containing 20 populations separated at  $F_{st} = 0.01$ , 10,000 individuals, and 50,000 SNPs. All methods were run with default settings.
