# Supplementary material for: Scalable probabilistic PCA for large-scale genetic variation data
Source: PLoS Genet. 2020 May 29;16(5):e1008773. doi: 10.1371/journal.pgen.1008773 (PMC7286535; doi:10.1371/journal.pgen.1008773)
Supplement: S4 Table — Our selection scan on the unrelated White British population resulted in 59 significant SNPs. Our significance threshold was a Bonferroni corrected p < 0.05. Bonferroni corrected p-values are shown. (XLSX) [file pgen.1008773.s017.xlsx]

## Sheet: Table S4
Table S4: Table of significant SNPs found by selection scan on unrelated White British. Our selection scan on the unrelated White British population resulted in 59 significant SNPs. Our significance threshold was a Bonferroni corrected p < 0.05. Bonferroni corrected p-values are shown.
SNP	PC1	PC2	PC3	PC4	PC5
rs79907870	1	0.00799562	1	1	1
rs6670894	1	0.0154073	1	1	1
rs7570971	2.64e-09	1	0.0525003	1	1
Affx-17900027	4.7e-05	1	0.94916	1	1
rs1375132	0.000631927	1	0.927756	1	1
rs1446585	1.7e-07	1	0.00158508	1	1
rs2322659	0.000894431	1	0.220337	1	1
rs2236783	3.4e-06	1	0.035381	1	1
rs309125	3.38e-06	1	0.0189111	1	1
rs6716536	2.43e-05	1	0.0517893	1	1
rs13131593	1	1	1	1	4.93e-05
rs7660102	1	1	1	1	2.39e-05
rs11729638	1	1	0.161626	1	8.5e-06
rs6853255	1	1	0.700352	1	0.00103318
Affx-35294751	0.00073162	1	0.000262162	1	2.53e-07
rs10776483	0.000467872	0.0278682	0.000241825	1	3.89e-07
rs11096955	0.000301164	1	4.18e-08	1	1.14e-07
rs11096956	0.000265	0.0141827	0.000294349	1	2.5e-07
rs11096957	0.000386583	1	4.61e-08	1	1.21e-07
rs73236616	7.69e-05	0.807384	4.96e-06	1	3.14e-09
rs5743614	2.8e-09	0.000858025	3.82e-09	1	1.75e-18
rs4833095	1.8e-09	0.000340639	1.56e-09	1	4.64e-18
rs5743566	8.29e-05	1	6.6e-06	1	5.37e-09
rs5743560	7.09e-05	1	7.21e-06	1	1.23e-09
rs5743810	1	1	1	1	1.23e-05
rs6531668	1	1	1	1	4.23e-05
rs73236633	9.99e-05	0.942987	0.000281902	1	3.26e-08
rs73236649	0.000229306	1	0.000140379	1	8.51e-08
rs6851685	4.57e-08	0.0160796	4.9e-06	1	8.14e-15
rs4833106	1	1	1	1	0.010835
rs112873858	1	1	1	8.29e-05	1
rs79194719	1	0.0247555	1	0.0193468	1
rs77635680	1	0.000687167	1	0.0365609	1
rs7773997	1.34e-06	1	1	1	1
rs3778607	1.53e-05	1	1	1	1
rs872071	4.99e-05	1	1	1	1
rs9378805	0.000184581	1	1	1	1
rs62389423	8.8e-36	1	1	1	0.00696174
rs1473909	0.00289641	1	1	1	1
rs6918152	0.00291115	1	1	1	1
rs9267810	0.0330364	1	1	1	1
rs2269424	0.0236781	1	1	1	1
rs1061807	0.0243318	1	1	1	1
rs9267817	0.0191211	1	1	1	1
rs1035798	0.0454273	1	1	1	1
rs12380860	1	0.026696	1	1	1
rs1129038	1	0.00245893	1	1	1
rs12913832	1	0.00161319	1	1	1
rs62048361	1	0.0123159	1	1	1
rs61747071	1	0.00648571	1	1	1
rs516246	0.00267139	1	1	1	1
rs492602	0.00217383	1	1	1	1
rs681343	0.00231481	1	1	1	1
rs601338	0.00234875	1	1	1	1
rs602662	0.0188203	1	1	1	1
rs485186	0.0239584	1	1	1	1
rs504963	0.018392	1	1	1	1
rs503279	0.0163532	1	1	1	1
rs676388	0.0434839	1	1	1	1
